# Supplementary material for: Analysis of Systemic Epigenetic Alterations in Inflammatory Bowel Disease: Defining Geographical, Genetic and Immune-Inflammatory influences on the Circulating Methylome
Source: PubMed Central journal article supplement — J Crohns Colitis. 2022 Aug 27;17(2):170–84. doi: 10.1093/ecco-jcc/jjac127 (PMC10024547; doi:10.1093/ecco-jcc/jjac127), 2022-08-27

# Supplementary Figure 5

A) DNAm Age Prediction

IBD IBD FALSE IBD TRUE

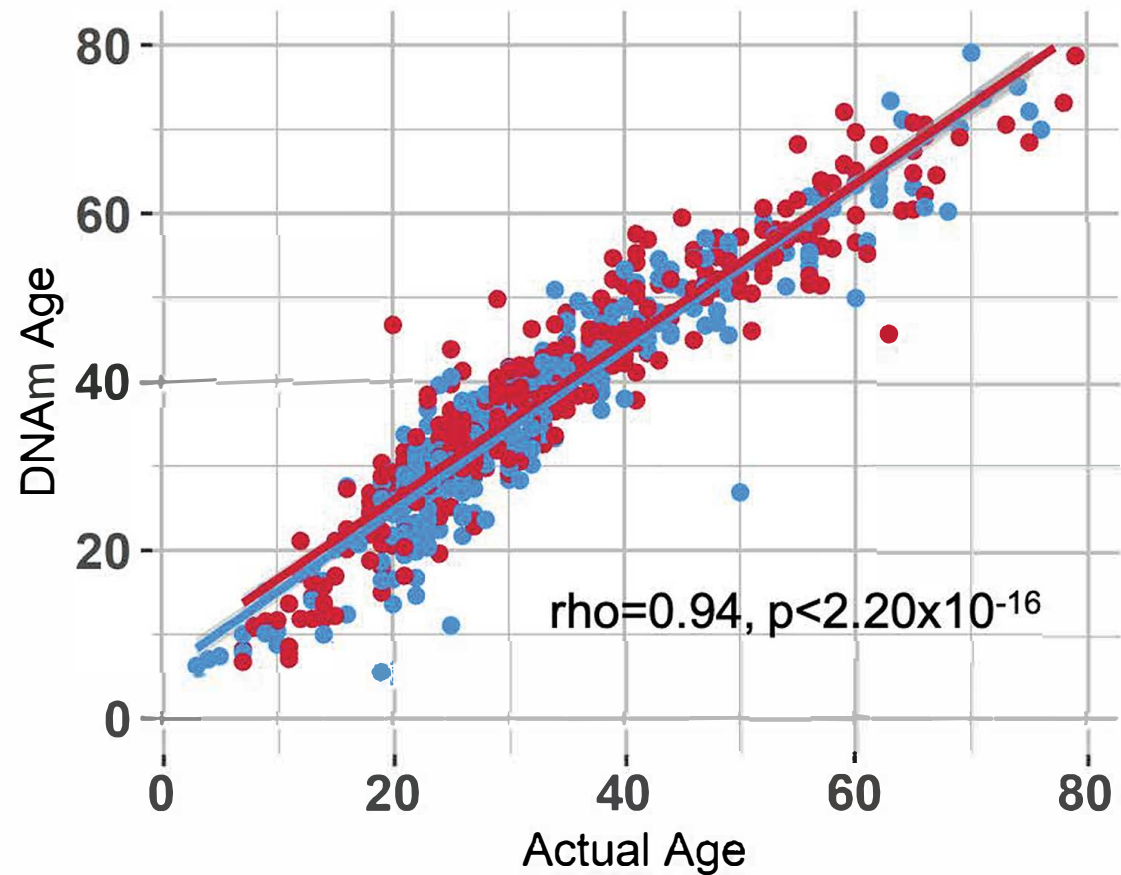

B) Age Acceleration

IBD CD non-IBD UC

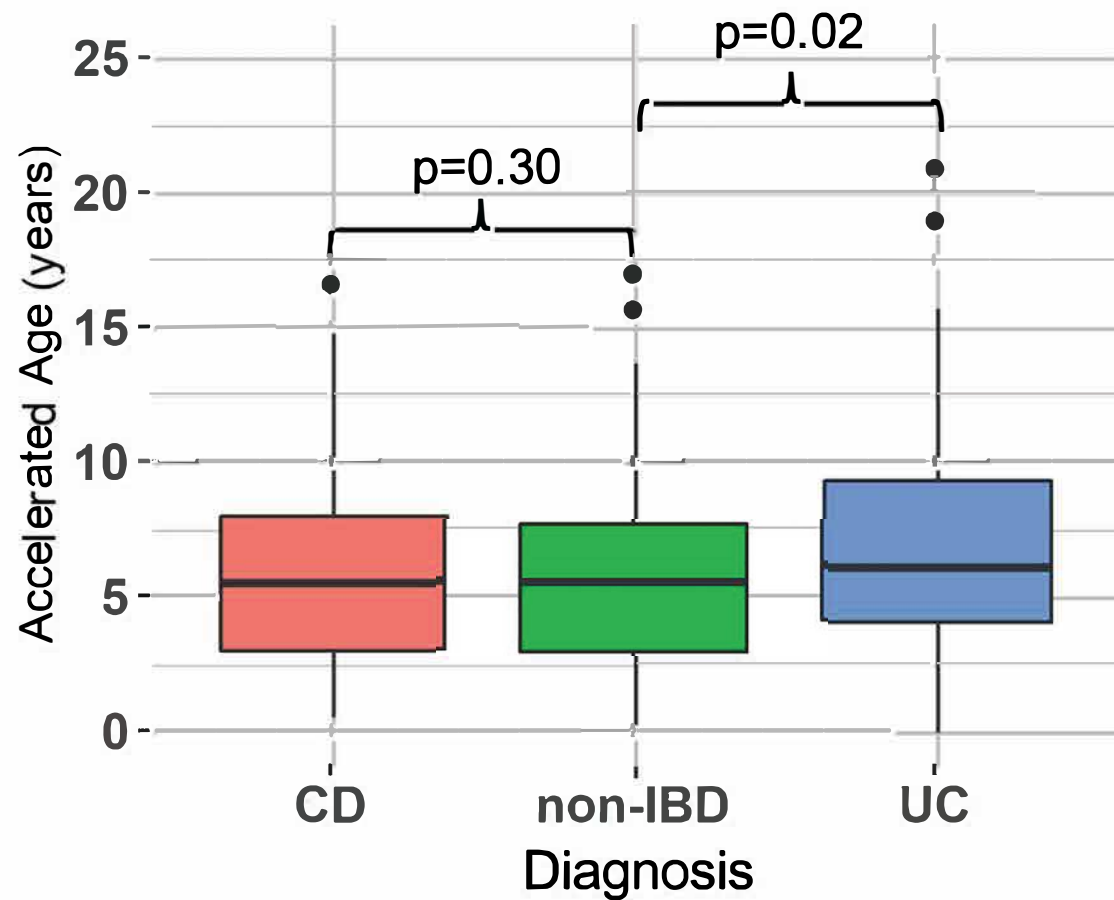

Supplement: jjac127_suppl_supplementary_figure_s5.pdf [file jjac127_suppl_supplementary_figure_s5.pdf]
