# Supplementary figures and images for: Analysis of Systemic Epigenetic Alterations in Inflammatory Bowel Disease: Defining Geographical, Genetic and Immune-Inflammatory influences on the Circulating Methylome
Source: PubMed Central journal article supplement — J Crohns Colitis. 2022 Aug 27;17(2):170–84. doi: 10.1093/ecco-jcc/jjac127 (PMC10024547; doi:10.1093/ecco-jcc/jjac127), 2022-08-27

**Supplementary Figure 1**

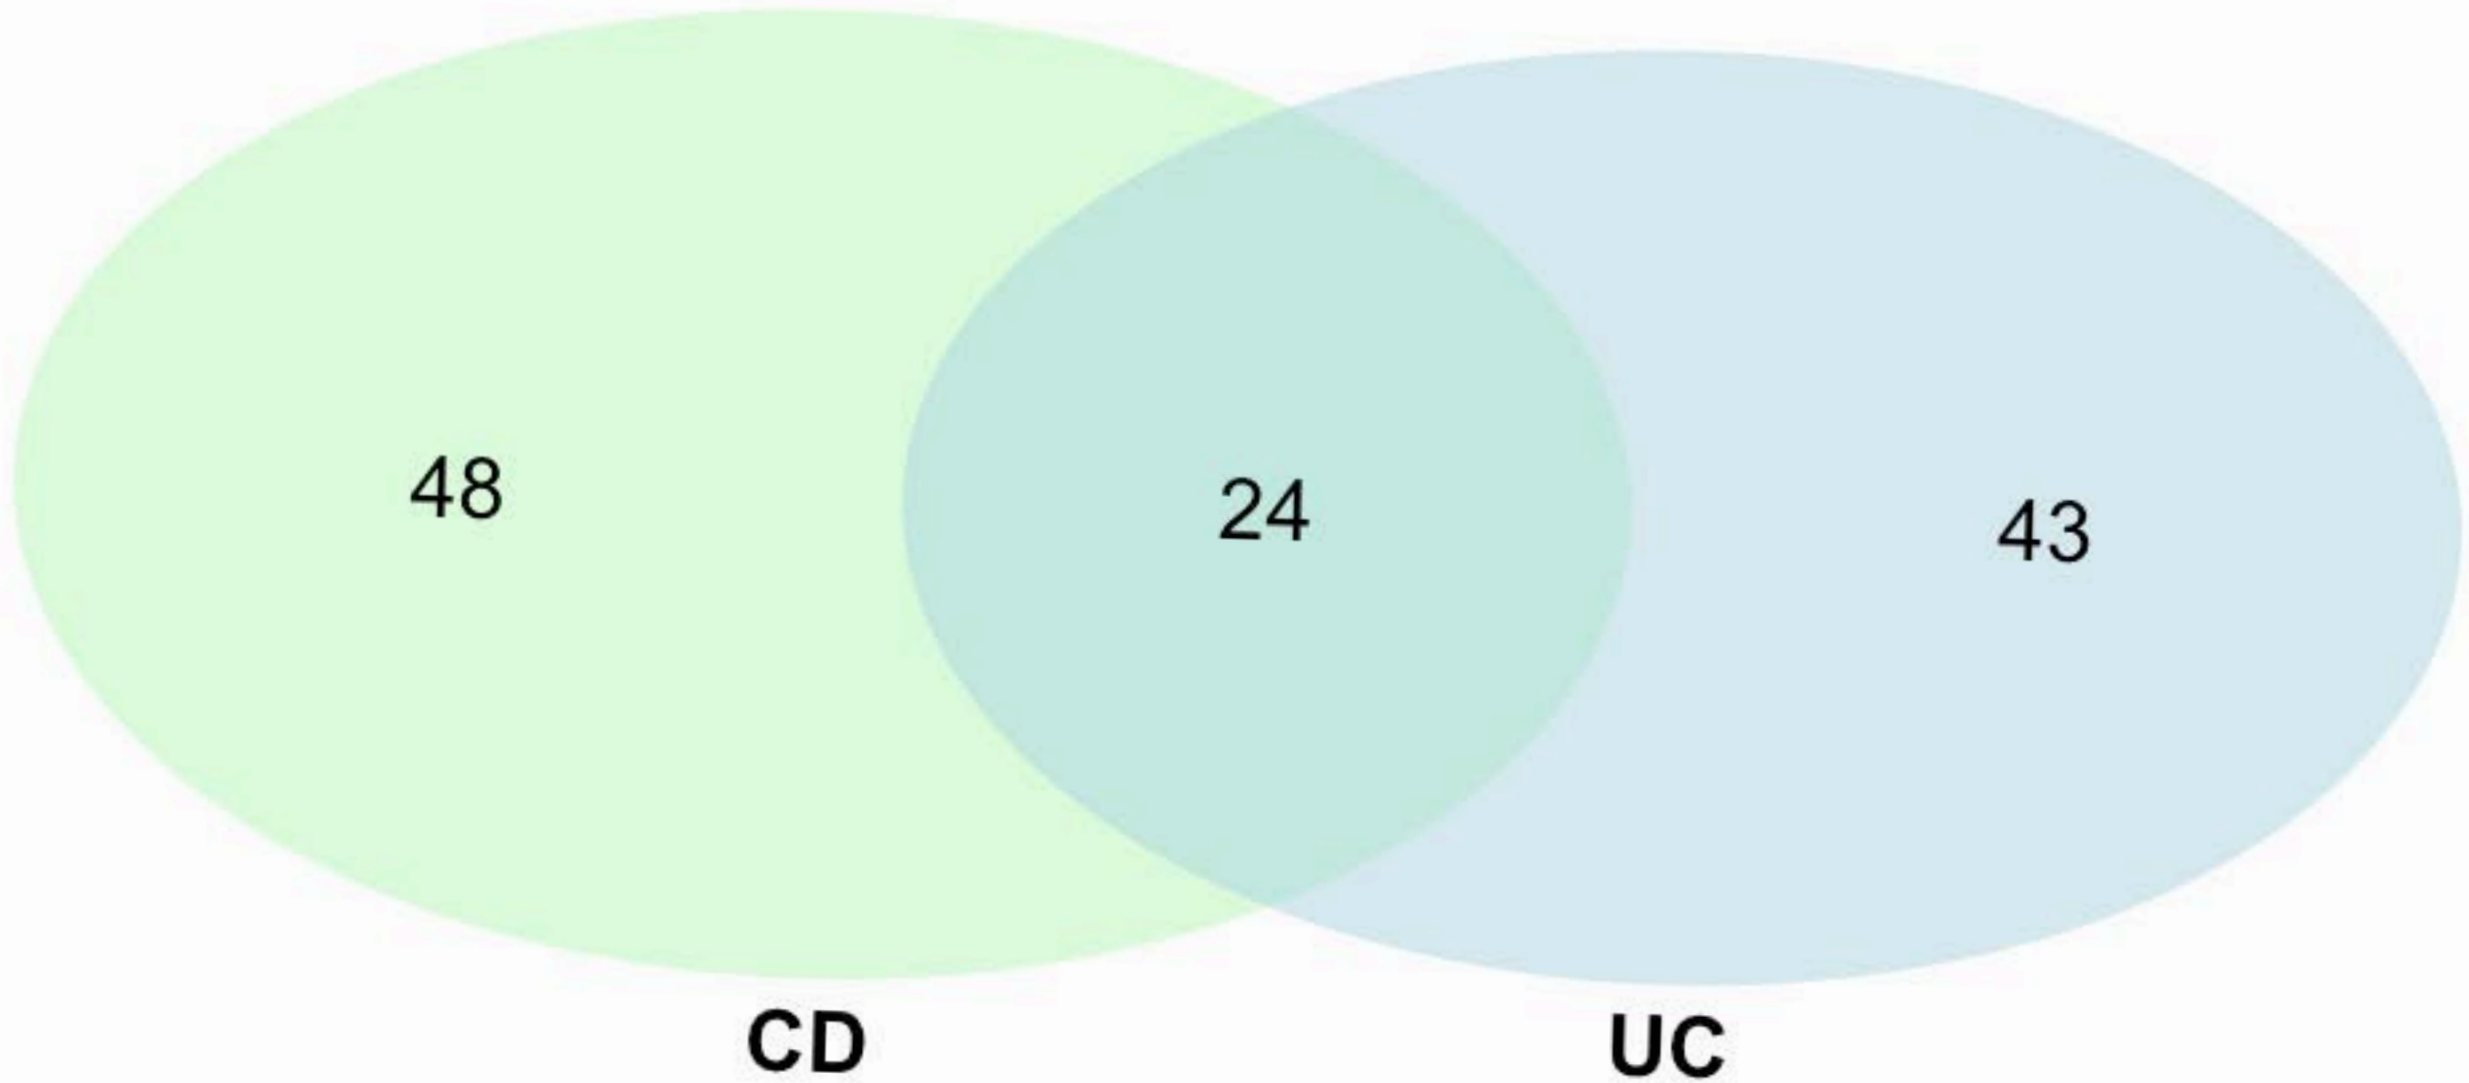

Supplement: jjac127_suppl_supplementary_figure_s1.pdf [file jjac127_suppl_supplementary_figure_s1.pdf]

**Supplementary Figure 2**

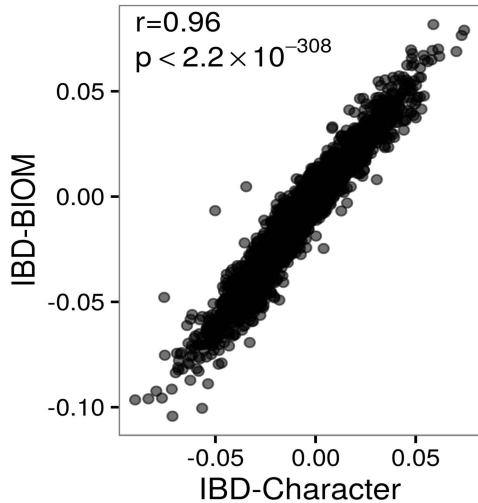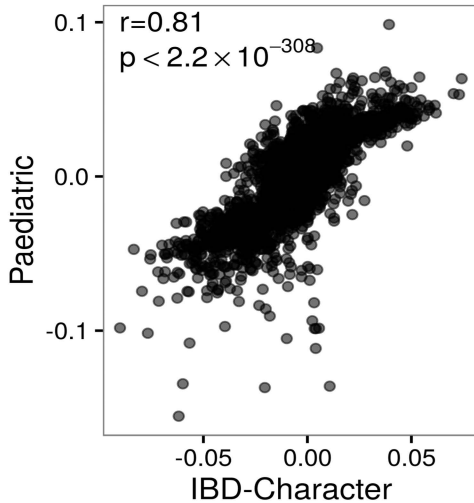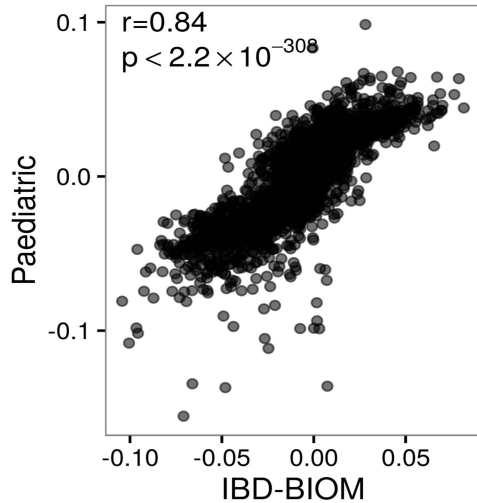

Supplement: jjac127_suppl_supplementary_figure_s2.pdf [file jjac127_suppl_supplementary_figure_s2.pdf]

**Supplementary Figure 3: eFORGE cell-of-origin for top DMPs**

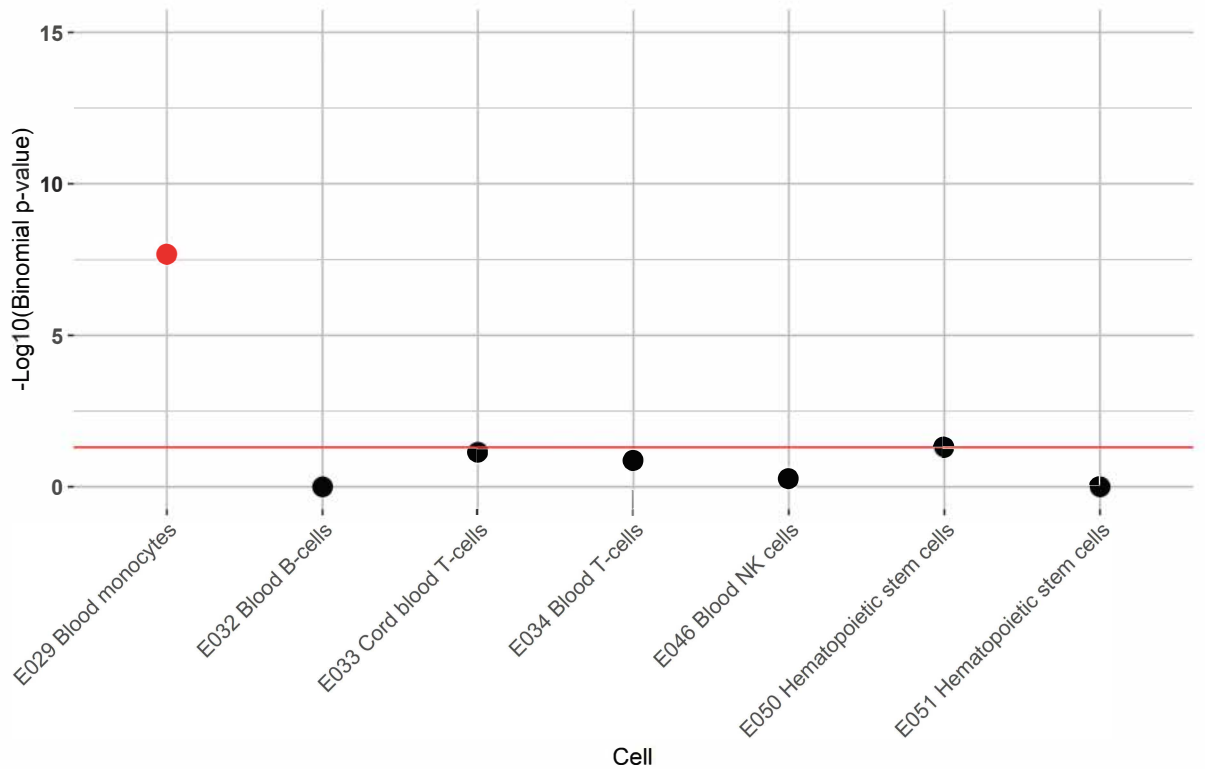

Supplement: jjac127_suppl_supplementary_figure_s3.pdf [file jjac127_suppl_supplementary_figure_s3.pdf]

# Supplementary Figure 4

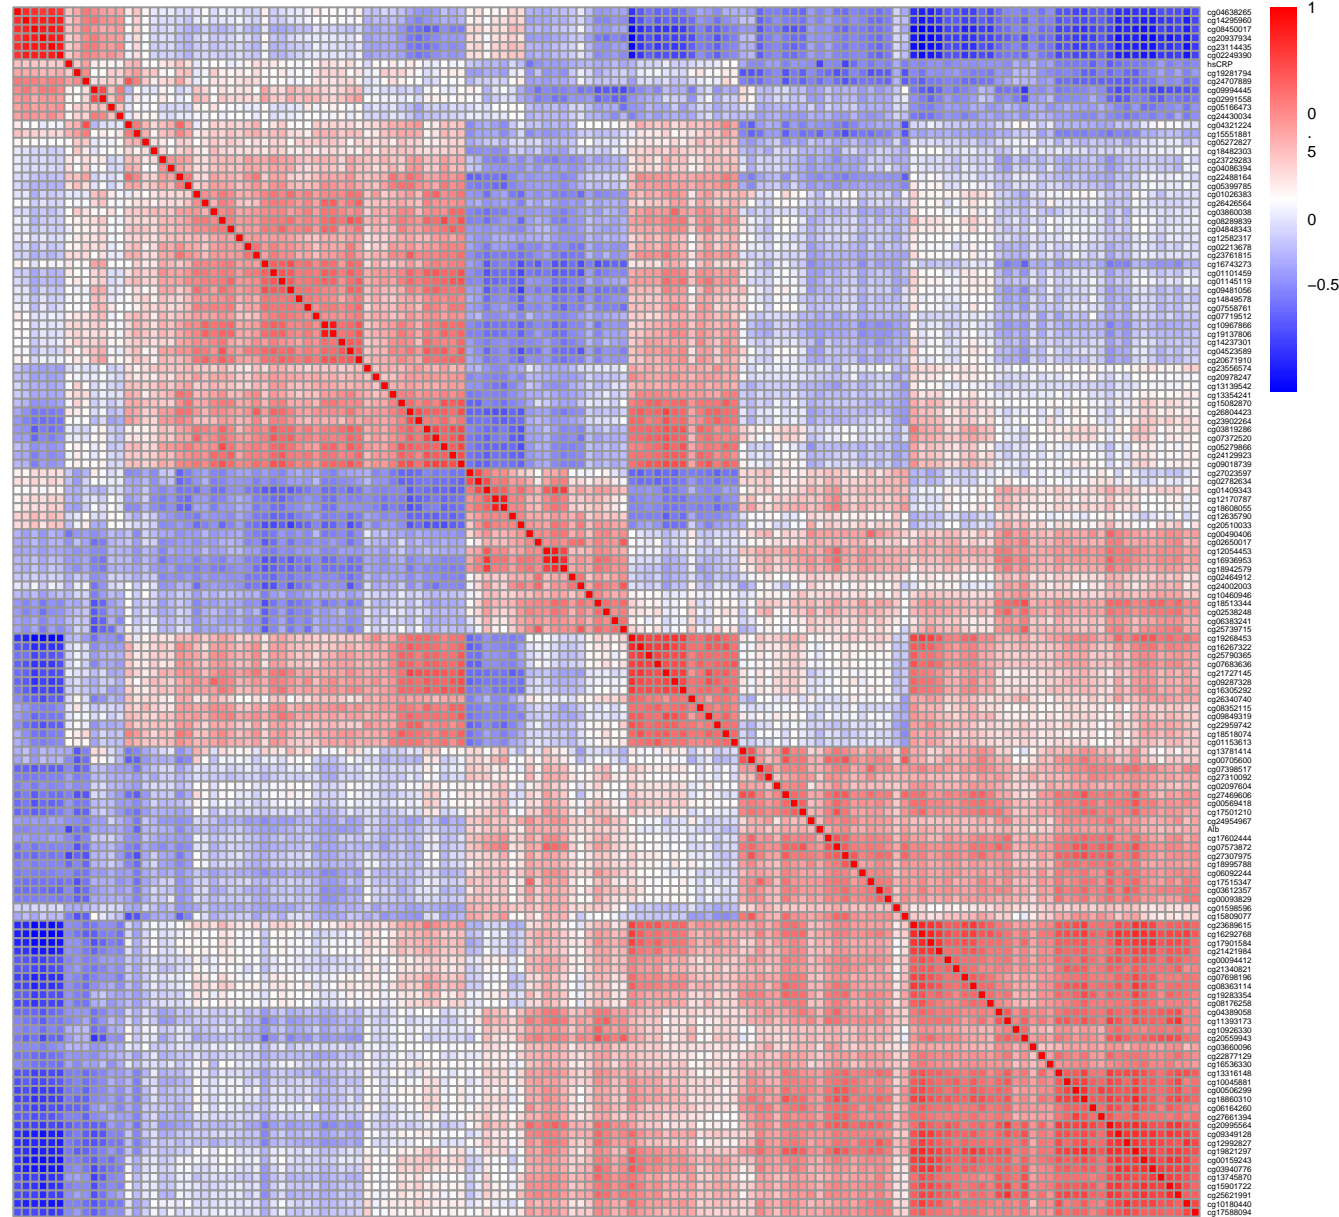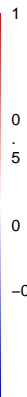

Supplement: jjac127_suppl_supplementary_figure_s4.pdf [file jjac127_suppl_supplementary_figure_s4.pdf]

# Supplementary Figure 6

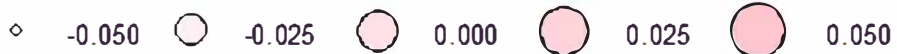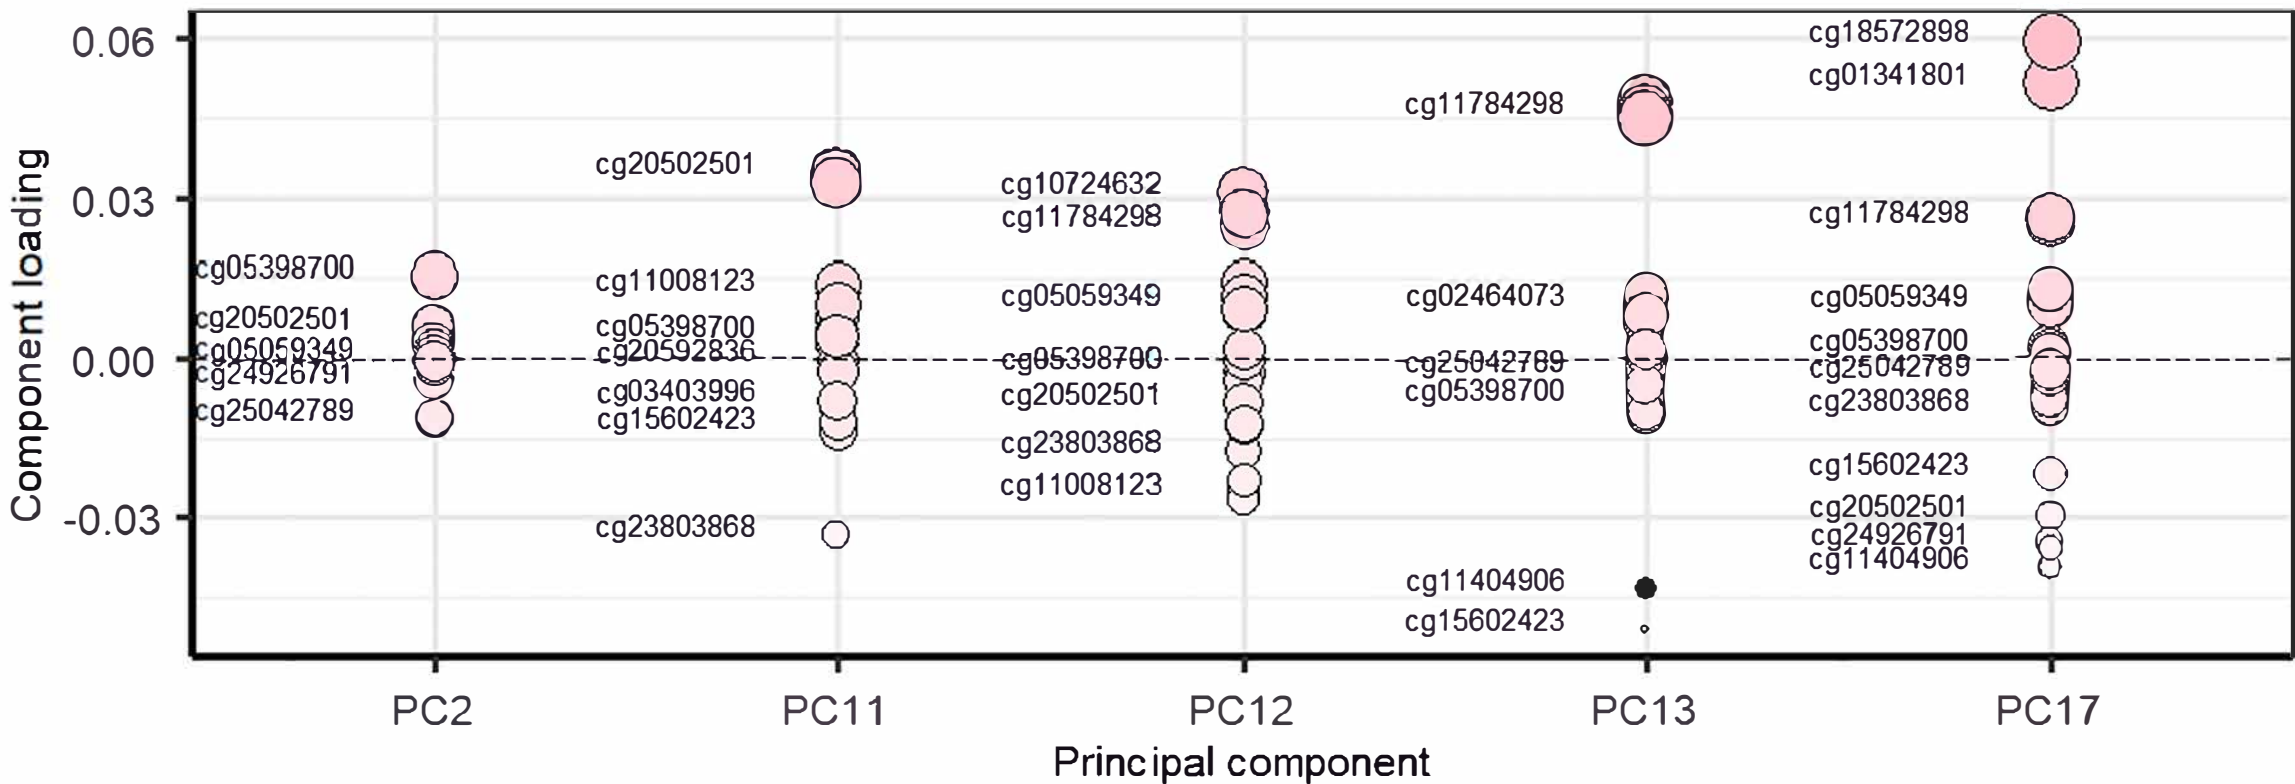

Top 5% variables

Supplement: jjac127_suppl_supplementary_figure_s6.pdf [file jjac127_suppl_supplementary_figure_s6.pdf]
